# Supplementary material for: Two doses of SARS-CoV-2 vaccination induce more robust immune responses to emerging SARS-CoV-2 variants of concern than does natural infection.
Source: Research Square preprint supplement (doi:10.21203/rs.3.rs-226857/v2), 2021-03-29
Supplement: Supplementary file 1 [file d06d25d3b1041a2ff45f9f74.docx]

Table S3.

A. *r* values of cross- correlation data using live neutralization assay NT50 values, MSD antigen binding and MSD ACE Inhibition binding data

B. *r* values of cross- correlation data using live neutralization assay NT50 values and MSD antigen binding data

C. *r* values of cross- correlation data using live neutralization assay NT50 values, MSD antigen binding and MSD ACE Inhibition binding and Total Spike ELISpot data
